# Supplementary material for: Preparation of an ultrathin 2D/2D rGO/g-C3N4 nanocomposite with enhanced visible-light-driven photocatalytic performance
Source: Royal Society of Chemistry journal article supplement (doi:10.1039/c7ra06210a), 2017-01-01
Supplement: c7ra06210a1.pdf [file c7ra06210a1.pdf]

**Preparation of an ultrathin 2D/2D rGO/g-C<sub>3</sub>N<sub>4</sub> nanocomposite with  
enhanced visible-light-driven photocatalytic performance**

Kun Yu,<sup>ab</sup> Xiaofeng Hu,<sup>ab</sup> Kaiyuan Yao,<sup>ab</sup> Ping Luo,<sup>ab</sup> Xiuyuan Wang,<sup>c</sup> Huihu  
Wang<sup>\*ab</sup>

*a. Hubei Provincial Key Laboratory of Green Materials for Light Industry, Hubei  
University of Technology, Wuhan, P. R. China*

*b. School of Materials and Chemical Engineering, Hubei University of Technology,  
Wuhan, P. R. China*

*c. College of Plant Science and Technology, Huazhong Agricultural University,  
Wuhan, P. R. China*

*To whom correspondence should be addressed.*

*Email: wanghuihu@hbut.edu.cn*

Fig. S1 shows the schematic diagram of the photoreactor for CO<sub>2</sub> photoreduction. The pressure of the photoreactor can be well controlled by the intake-pipe, exhaust-pipe and pressure gage.

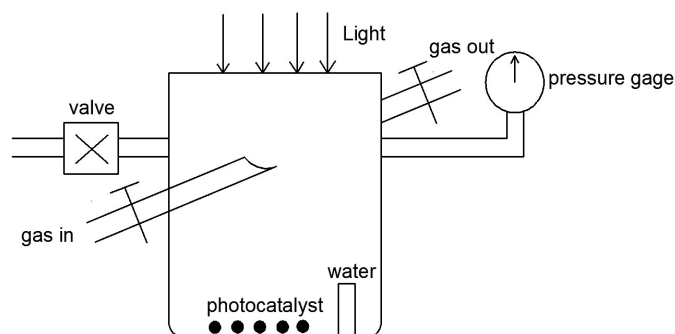

**Fig. S1** Schematic diagram of the photoreactor.

Fig. S2 displays the UV-Vis spectrum of the 400 nm cutoff filter. It can be observed that there is no UV light in the spectrum.

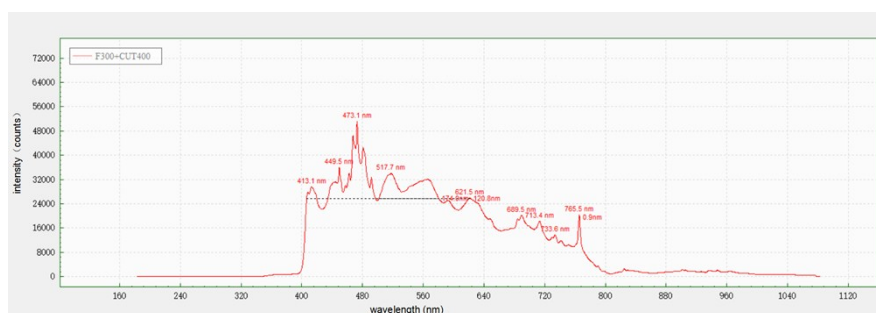

**Fig. S2** UV-Vis spectrum of the 400 nm cutoff filter.

Fig. S3 shows the N<sub>2</sub> adsorption-desorption isotherms of the g-C<sub>3</sub>N<sub>4</sub> bulks, ultrathin g-C<sub>3</sub>N<sub>4</sub> nanosheets, and 3rGO/g-C<sub>3</sub>N<sub>4</sub> nanocomposite. It is obvious that the adsorption-desorption isotherms of different samples follows the sequence: ultrathin g-C<sub>3</sub>N<sub>4</sub> nanosheets > 3rGO/g-C<sub>3</sub>N<sub>4</sub> > g-C<sub>3</sub>N<sub>4</sub> bulks, which is consistent with the surface area data.

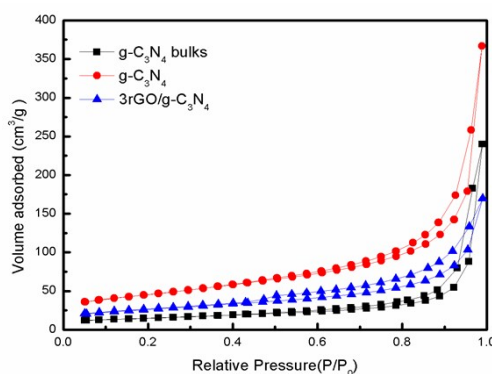

**Fig. S3** Nitrogen adsorption-desorption isotherms of g-C<sub>3</sub>N<sub>4</sub> bulks, ultrathin g-C<sub>3</sub>N<sub>4</sub> nanosheets, and 3rGO/g-C<sub>3</sub>N<sub>4</sub>.

Fig. S4 displays the absorbance spectra of MO solution during photocatalytic reaction using pure g-C<sub>3</sub>N<sub>4</sub> nanosheets and 3rGO/g-C<sub>3</sub>N<sub>4</sub> nanocomposite as photocatalysts. The arrows demonstrate the decline of MO absorbance peak intensity

over time. It is obvious that the absorbance peak intensity of MO solution at 464nm over 3rGO/g-C<sub>3</sub>N<sub>4</sub> nanocomposite decreases more quickly than that of pure g-C<sub>3</sub>N<sub>4</sub>, indicating the higher photocatalytic activity of 3rGO/g-C<sub>3</sub>N<sub>4</sub>.

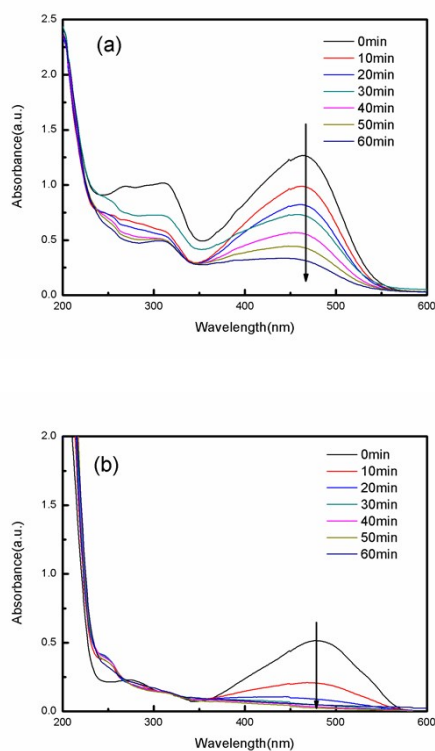

**Fig. S4** The absorbance spectra of MO solution during photocatalytic reaction using ultrathin g-C<sub>3</sub>N<sub>4</sub> (a) and 3rGO/g-C<sub>3</sub>N<sub>4</sub> (b) as photocatalysts.
